# Supplementary material for: An Overview of Analytical Methods for Quantitative Determination of Coenzyme Q10 in Foods
Source: MDPI journal article supplement (doi:10.3390/metabo13020272), 2023-02-14
Supplement: s1 [file s1]

Supporting information for:

# An Overview of Analytical Methods for Quantitative Determination of Coenzyme Q10 in Foods

Andersina Simina Podar <sup>1,2</sup>, Cristina Anamaria Semeniuc <sup>2,3,\*</sup>, Simona Raluca Ionescu <sup>2,3</sup>, Maria-Ioana Socaciu <sup>2,3</sup>, Melinda Fogarasi <sup>2,3</sup>, Anca Corina Fărcaș <sup>1,2</sup>, Dan Cristian Vodnar <sup>1,2</sup> and Sonia Ancuța Socaci <sup>1,2,\*</sup>

<sup>1</sup> Department of Food Science, University of Agricultural Sciences and Veterinary Medicine of Cluj-Napoca, 3-5 Mănăștur St., 400372 Cluj-Napoca, Romania; andersina-simina.podar@usamvcluj.ro (A.S.P.); anca.farcas@usamvcluj.ro (A.C.F.); dan.vodnar@usamvcluj.ro (D.C.V.)

<sup>2</sup> Centre for Technology Transfer-BioTech, 64 Calea Florești, 400509 Cluj-Napoca, Romania

<sup>3</sup> Department of Food Engineering, University of Agricultural Sciences and Veterinary Medicine of Cluj-Napoca, 3-5 Mănăștur St., 400372 Cluj-Napoca, Romania; rallucab@yahoo.com (S.R.I.), maria-ioana.socaciu@usamvcluj.ro (M.-I.S.); melinda.fogarasi@usamvcluj.ro (M.F.)

\* Correspondence: cristina.semeniuc@usamvcluj.ro (C.A.S.); sonia.socaci@usamvcluj.ro (S.A.S.); Tel.: +40-264-596-384 (C.A.S. & S.A.S.)

**Table S1.** Centralizing table of extraction methods used.

| Extraction method               | Sample weight/Reagents and materials used                                                                                                                                                                                    | Reference                      |
|---------------------------------|------------------------------------------------------------------------------------------------------------------------------------------------------------------------------------------------------------------------------|--------------------------------|
| <b>Direct extraction method</b> | Sample weight: 1-4 g<br>Reagents: 0.9% sodium chloride solution, ethanol/hexane (1:5, <i>v/v</i> ), sodium sulfate anhydrous, hexane                                                                                         | Weber et al., 1997             |
|                                 | Sample weight: 1 g<br>Reagents: 0.15 M sodium chloride solution (35 mL), ethanol (20 mL), <i>n</i> -hexane (100 mL), sodium sulfate anhydrous, 2-propanol (5 mL)                                                             | Mattila et al., 2000           |
|                                 | <b>For vegetable samples</b><br>Sample weight: 2 g<br>Reagents: 0.15 M sodium chloride solution (5 mL), ethanol (18 mL), <i>n</i> -hexane (60 mL), 2-propanol (2 mL)<br>Sample filtration: 0.2 µm PTFE membrane filter, Lida | Mattila and Kum-pulainen, 2001 |
|                                 | <b>For animal origin samples</b><br>Sample weight: 7 g<br>Reagents: ethanol (18 mL), <i>n</i> -hexane (60 mL), 2-propanol (2 mL)<br>Sample filtration: 0.2 µm PTFE membrane filter, Lida                                     | Mattila and Kum-pulainen, 2001 |
|                                 | Sample weight: 10 mg<br>Reagents:<br>0.15 M sodium chloride solution (200 µL), ethanol (200 µL), <i>n</i> -hexane (1500 µL), 2-propanol (200 µL)                                                                             | Purchas et al., 2004           |
|                                 | Sample weight: 1 g<br>Reagents: 0.15 M sodium chloride solution (5 mL), 0.1 M sodium dodecyl sulphate (5 mL), anhydrous ethanol (2 mL), hexane (10 mL), 2-propanol (1 mL)<br>Sample filtration: 0.45 µm PTFE membrane filter | Souchet and Laplante, 2007     |
|                                 | Sample weight: 2 g<br>Reagents: 0.15 M sodium chloride solution (5 mL), ethanol (18 mL), <i>n</i> -hexane (60 mL), 2-propanol (2 mL)<br>Sample filtration: 0.2 µm PTFE membrane filter                                       | Ercan and El, 2011             |
|                                 | Sample weight: 1 g<br>Reagents: Hanks' balanced salt solution (20 mL), ethanol (6.5 mL), <i>n</i> -hexane (20 mL), 2-propanol (2.5 mL)<br>Sample filtration: 0.2 µm surfactant free cellulose acetate filters                | Tobin et al., 2014             |
|                                 | Sample weight: 1 g<br>Reagents: 0.15 M sodium chloride solution (20 mL), ethanol (9 mL), <i>n</i> -hexane (30 mL), acetone (2.5 mL)                                                                                          | Román-Pizarro et al., 2017     |
|                                 | Sample weight: 0.05 g<br>Reagent: 2-propanol (7-12 mL)                                                                                                                                                                       | Kubo et al., 2008              |
|                                 | <b>For oils extracted by enzymatic hydrolysis and oils extracted using SCO<sub>2</sub> 600 g CO<sub>2</sub>/h+5% EtOH</b><br>Sample weight: unspecified amount<br>Reagent: 2-propanol (unspecified volume)                   | Laplante et al., 2009          |

| Extraction method                | Sample weight/Reagents and materials used                                                                                                                                                                                                                                                                                                                                                                                                   | Reference                      |
|----------------------------------|---------------------------------------------------------------------------------------------------------------------------------------------------------------------------------------------------------------------------------------------------------------------------------------------------------------------------------------------------------------------------------------------------------------------------------------------|--------------------------------|
|                                  | Sample weight: 0.05-0.1 g<br>Reagents: 2-propanol (2-3 mL)                                                                                                                                                                                                                                                                                                                                                                                  | Stiff et al., 2011             |
|                                  | Sample weight: 10-60 mg<br>Reagents: 2-propanol (1500 µL), saline solution (150 µL), hexane (500 µL), methanol/ethanol/propanol (100:95:5, <i>v/v/v</i> ) (60 µL)                                                                                                                                                                                                                                                                           | Niklowitz et al., 2013         |
|                                  | Sample: 50 mg<br>Reagents: nitrogen-saturated ethanol/water (95:5, <i>v/v</i> ) PBS solution (pH 6.5) (26.5 mL)                                                                                                                                                                                                                                                                                                                             | Li et al., 2016                |
| Ultrasonic extraction method     | Sample weight: 2.0 g<br>Reagents: liquid nitrogen, anhydrous ethanol (60 mL), hexane (unspecified volume)<br>Extraction time: 15 min                                                                                                                                                                                                                                                                                                        | Zu et al., 2006                |
| Saponification-extraction method | <b>For vegetable samples</b><br>Sample weight: 0.2 g<br>Reagents: 2% ascorbic acid solution (2 mL), methanol (5 mL), aqueous potassium hydroxide solution (50 g KOH + 50 mL H <sub>2</sub> O) (0.5 mL), 10% sodium chloride solution (7 mL), <i>n</i> -hexane (65 mL), 5% sodium chloride solution (20 mL), ethanol (5 mL), <i>n</i> -hexane/2-propanol (1:1, <i>v/v</i> ) (2-5 mL)<br>Sample filtration: 0.2 µm PTFE membrane filter, Lida | Mattila and Kum-pulainen, 2001 |
|                                  | <b>For animal samples</b><br>Sample weight: 2 g<br>Reagents: 2% ascorbic acid solution (2 mL), methanol (5 mL), potassium hydroxide solution (50 g KOH + 50 mL H <sub>2</sub> O) (0.5 mL), 10% sodium chloride solution (7 mL), <i>n</i> -hexane (65 mL), 5% sodium chloride solution (20 mL), ethanol (5 mL), <i>n</i> -hexane/2-propanol (3:7, <i>v/v</i> ) (2 mL)<br>Sample filtration: 0.2 µm PTFE membrane filter, Lida                | Mattila and Kum-pulainen, 2001 |
|                                  | Sample weight: 1 g<br>Reagents: 5% aqueous pyrogallol solution (5 mL), 10% sodium hydroxide solution (5 mL), methanol (10 mL), 10% sodium chloride solution (10 mL), <i>n</i> -hexane (65 mL), 5% sodium chloride solution (20 mL), ethanol (5 mL), 2-propanol (1 mL)<br>Sample filtration: 0.45 µm PTFE syringe filter, Whatman                                                                                                            | Pyo, 2010                      |
|                                  | Sample weight: 50 g<br>Reagents for saponification: distilled water (50 g), pyrogallol (2.5 g), methanol (70 mL), 25% aqueous potassium hydroxide solution (25 mL), petroleum ether 40-60 °C (75 mL), sodium sulfate anhydrous, ethanol (5 mL)<br>Purification of the saponified extract over alumina (50 x 1 cm) column<br>Separation of CoQ10 from the purified extract on silica gel F <sub>254</sub> glass plate (20 x 20 cm)           | Al-Faraji and Shanshal, 2010   |
|                                  | Sample weight: 2 g<br>Reagents: 2% ascorbic acid solution (2 mL), methanol (5 mL), potassium hydroxide solution (50 g KOH + 50 mL H <sub>2</sub> O) (0.5 mL), 10% sodium chlorine solution (7 mL), <i>n</i> -hexane (65 mL), 5% sodium chloride solution (20 mL), ethanol (5 mL), <i>n</i> -hexane/2-propanol (30:70, <i>v/v</i> ) (2 mL)                                                                                                   | Ercan and El, 2011             |

| Extraction method                           | Sample weight/Reagents and materials used                                                                                                                                                                                                                                                                                                                        | Reference                    |
|---------------------------------------------|------------------------------------------------------------------------------------------------------------------------------------------------------------------------------------------------------------------------------------------------------------------------------------------------------------------------------------------------------------------|------------------------------|
|                                             | Sample weight: 0.5 g<br>Reagents: 60% potassium hydroxide solution (2 mL), 6% ethanolic pyrogallol solution (5 mL), 96% ethanol (2 mL), 1% sodium chloride solution (15 mL), hexane/ethyl acetate (9:1, <i>v/v</i> ) (15 mL), 1% 2-propanol in <i>n</i> -hexane (2 mL)                                                                                           | Manzi and Durazzo, 2015      |
|                                             | Sample weight: 35 g<br>Reagents: 2 N ethanolic potassium hydroxide solution (35 mL), 1% ethanolic pyrogallol solution (20 mL), bidistilled water (105 mL), ethanol (10 mL), petroleum ether/diethyl ether (9:1, <i>v/v</i> ) (70 mL), sodium sulfate anhydrous (5 g), 2-propanol (1 mL)<br>Sample filtration: 0.45 µm nylon syringe filter, Agilent Technologies | Mandrioli et al., 2018       |
| <b>Solid-phase extraction (SPE)</b>         | Sample weight: 0.25 g<br>Reagents: heptane (21.5 mL), heptane/ethyl ether (80:20, <i>v/v</i> ) (34 mL), acetonitrile/tetrahydrofuran (90:10, <i>v/v</i> ) (2 mL)<br>5 g of solid-phase extraction (SPE) cartridge with amino-propyl (NH <sub>2</sub> ) adsorbents, Varian                                                                                        | Rodríguez-Acuña et al., 2008 |
| <b>Accelerated solvent extraction (ASE)</b> | Sample weight: 1 g<br>Reagents: Cleanert Alumina-N (3 g), absolute ethanol (19 mL)<br>Temperature: 80°C<br>Heat-up time: 5 min<br>Static time: 5 min<br>Flush volume: 60%<br>Purge time: 1 min<br>Number of cycles: 1<br>Cell volume: 10 mL<br>Total extraction time: 16-17 min/sample<br>Sample filtration: 0.45 µm nylon filter membrane, Phenomenex           | Xue et al., 2012             |

**Table S2.** Centralizing table of quantification methods used.

17

| Quantification method                    | Reference                     |
|------------------------------------------|-------------------------------|
| HPLC with UV detection                   | Weber et al., 1997            |
|                                          | Purchas et al., 2004          |
|                                          | Al-Faraji and Shanshal, 2010  |
|                                          | Stiff et al., 2011            |
|                                          | Ercan and El, 2011            |
|                                          | Tobin et al., 2014            |
|                                          | Manzi and Durazzo, 2015       |
| HPLC with DA detection                   | Mattila et al., 2000          |
|                                          | Mattila and Kumpulainen, 2001 |
|                                          | Souchet and Laplante, 2007    |
|                                          | Laplante et al., 2009         |
|                                          | Xue et al., 2012              |
|                                          | Román-Pizarro et al., 2017    |
|                                          | Mandrioli et al., 2018        |
| HPLC with EC detection                   | Mattila et al., 2000          |
|                                          | Niklowitz et al., 2013        |
| HPLC/ESI-MS detection                    | Pyo, 2010                     |
| HPLC/ESI-MS/MS detection                 | Zu et al., 2006               |
| HPLC with AEC detection                  | Kubo et al., 2008             |
| HPLC/APCI-MS detection                   | Rodríguez-Acuña et al., 2008  |
| CEFS detection                           | Román-Pizarro et al., 2017    |
| DPV using an electrochemical workstation | Li et al., 2016               |

HPLC-high-performance liquid chromatography; UV-ultraviolet; DA-Diode Array; EC-electrochemical; ESI-Electrospray ionization; MS-Mass spectrometry; AEC-amperometric electrochemical; APCI-atmospheric pressure chemical ionization; CEFS-Cary Eclipse fluorescence spectrometer; DPV-differential pulse voltammetry.

18  
19  
20  
21  
22

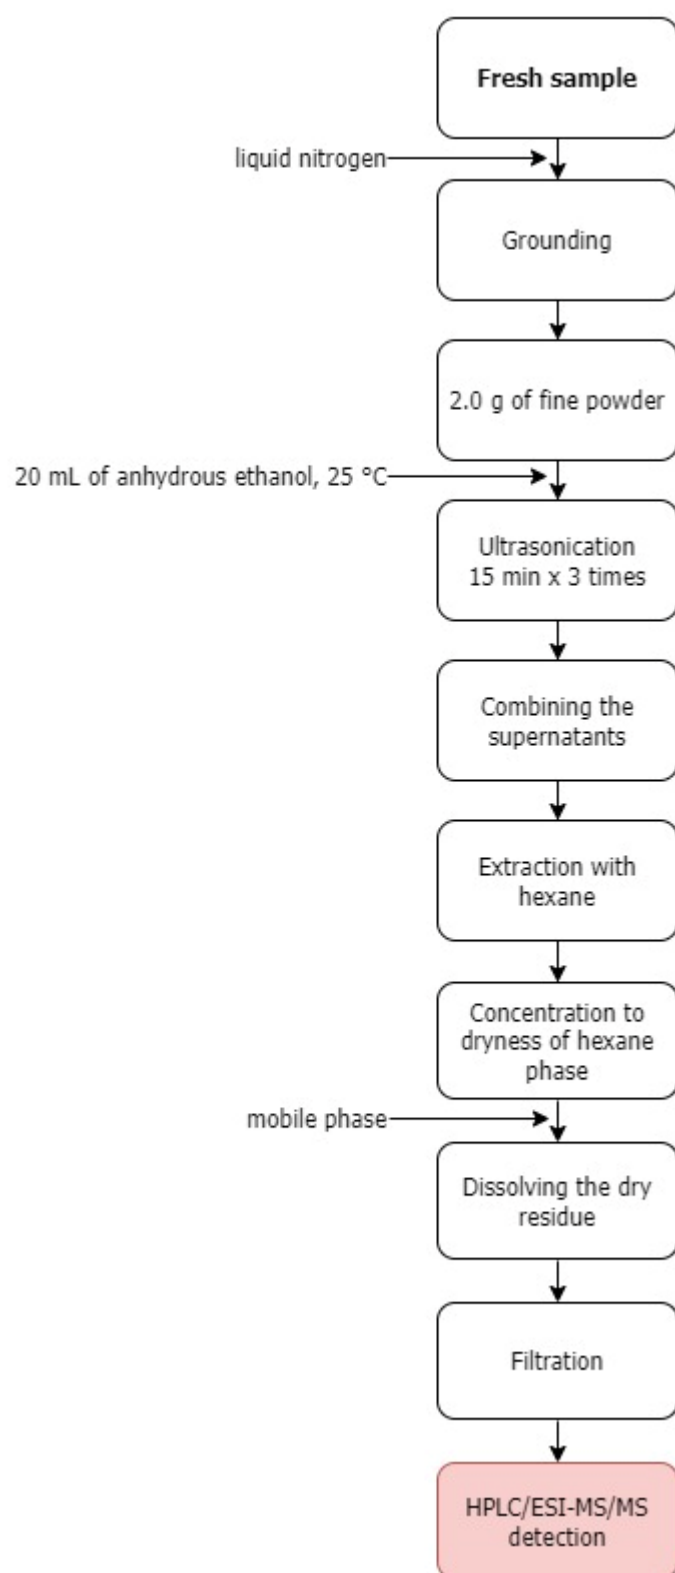

**Figure S1.** Workflow of the analytical method adapted from Zu et al., 2006.

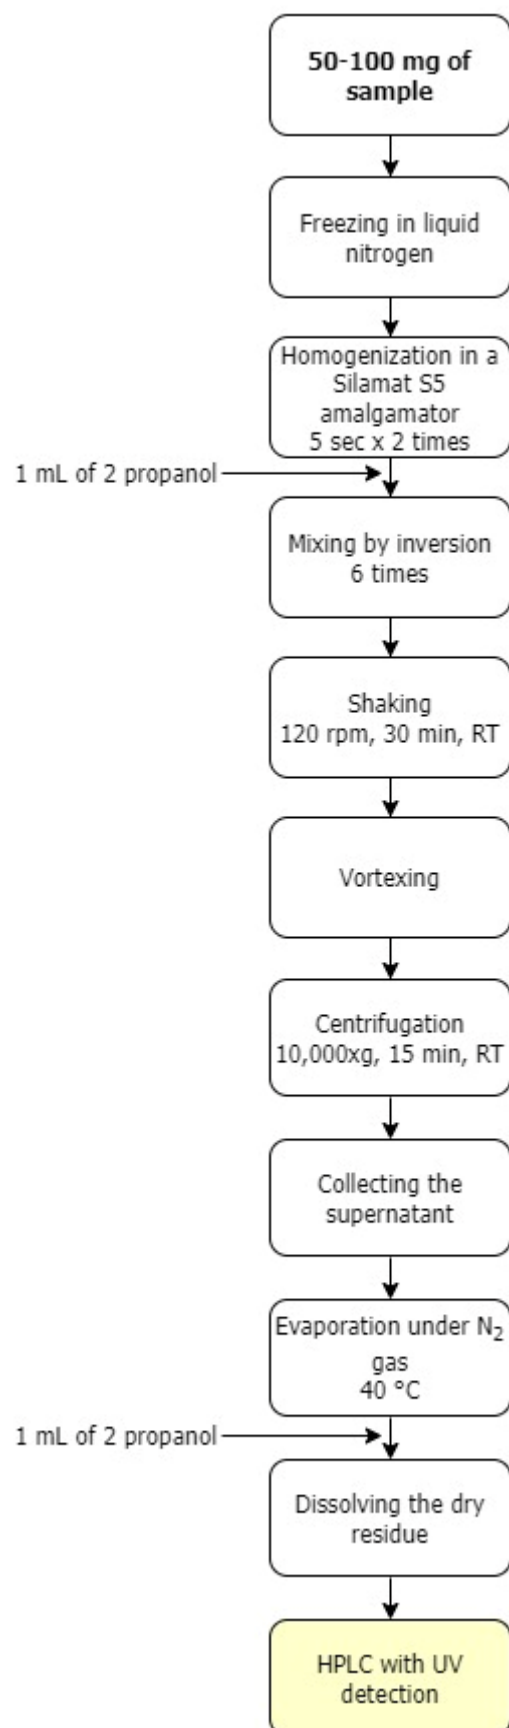

**Figure S2.** Workflow of the analytical method adapted from of Stiff et al., 2011.

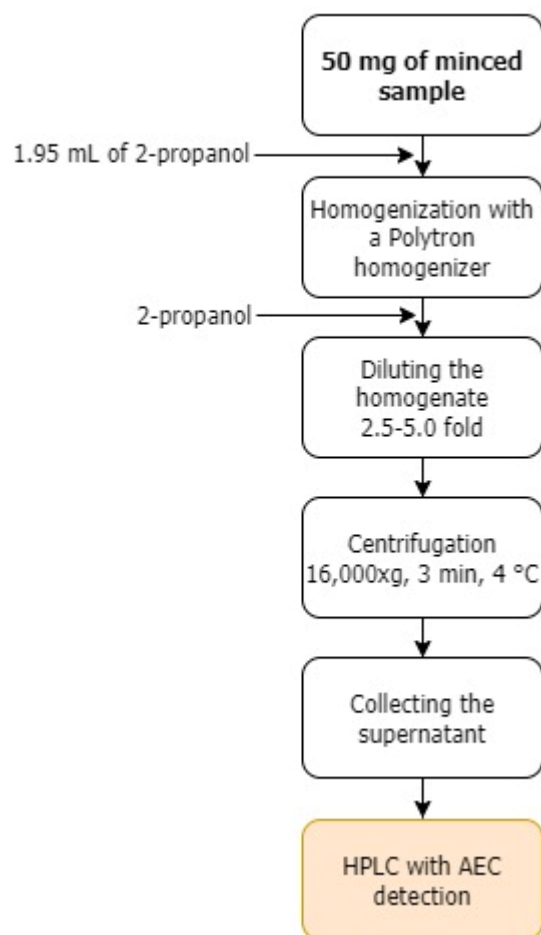

**Figure S3.** Workflow of the analytical method adapted from Kubo et al., 2008.



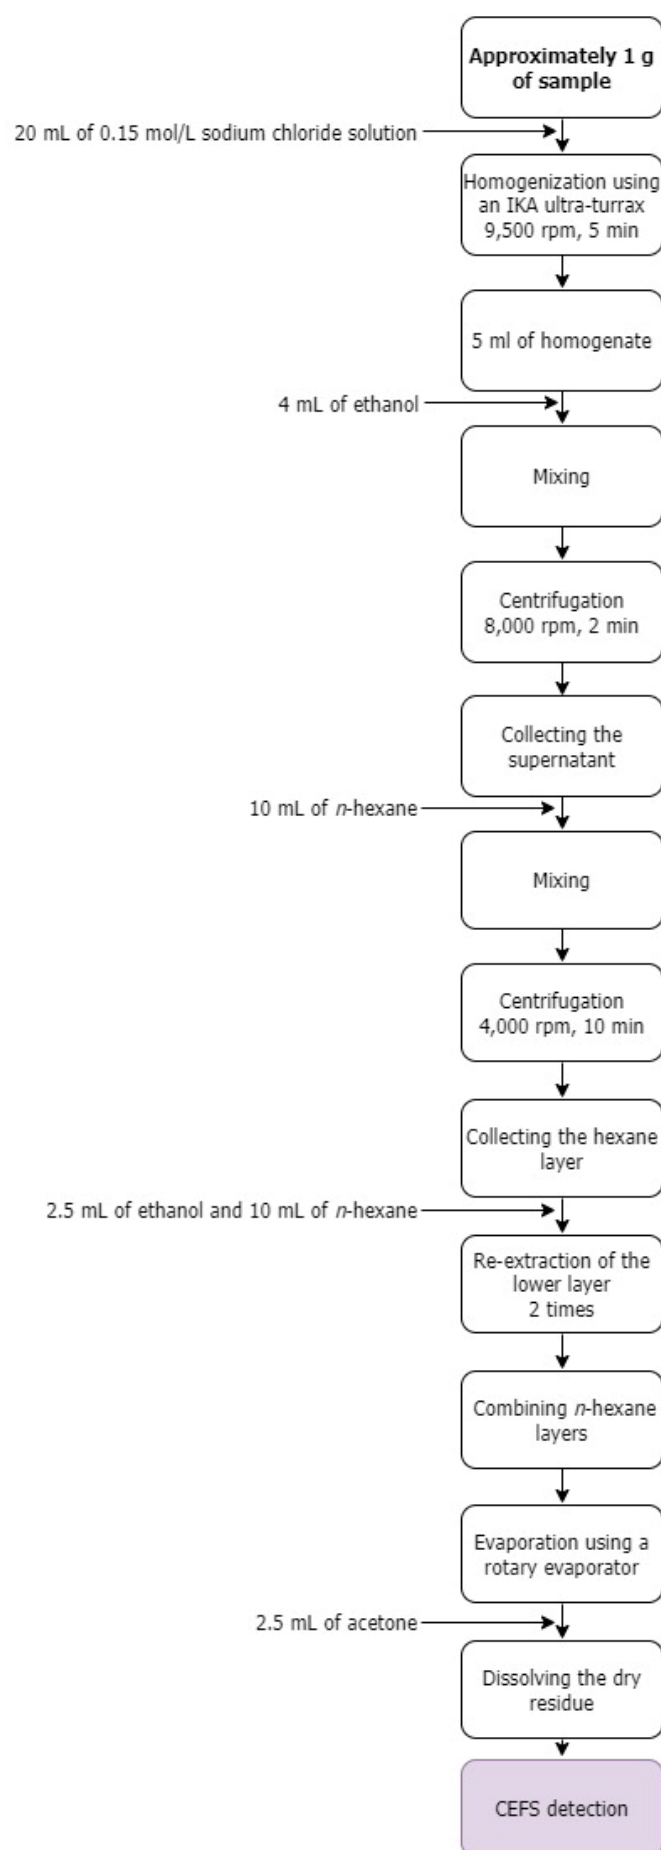

**Figure S4.** Workflow of the analytical method adapted from Román-Pizarro et al., 2017.

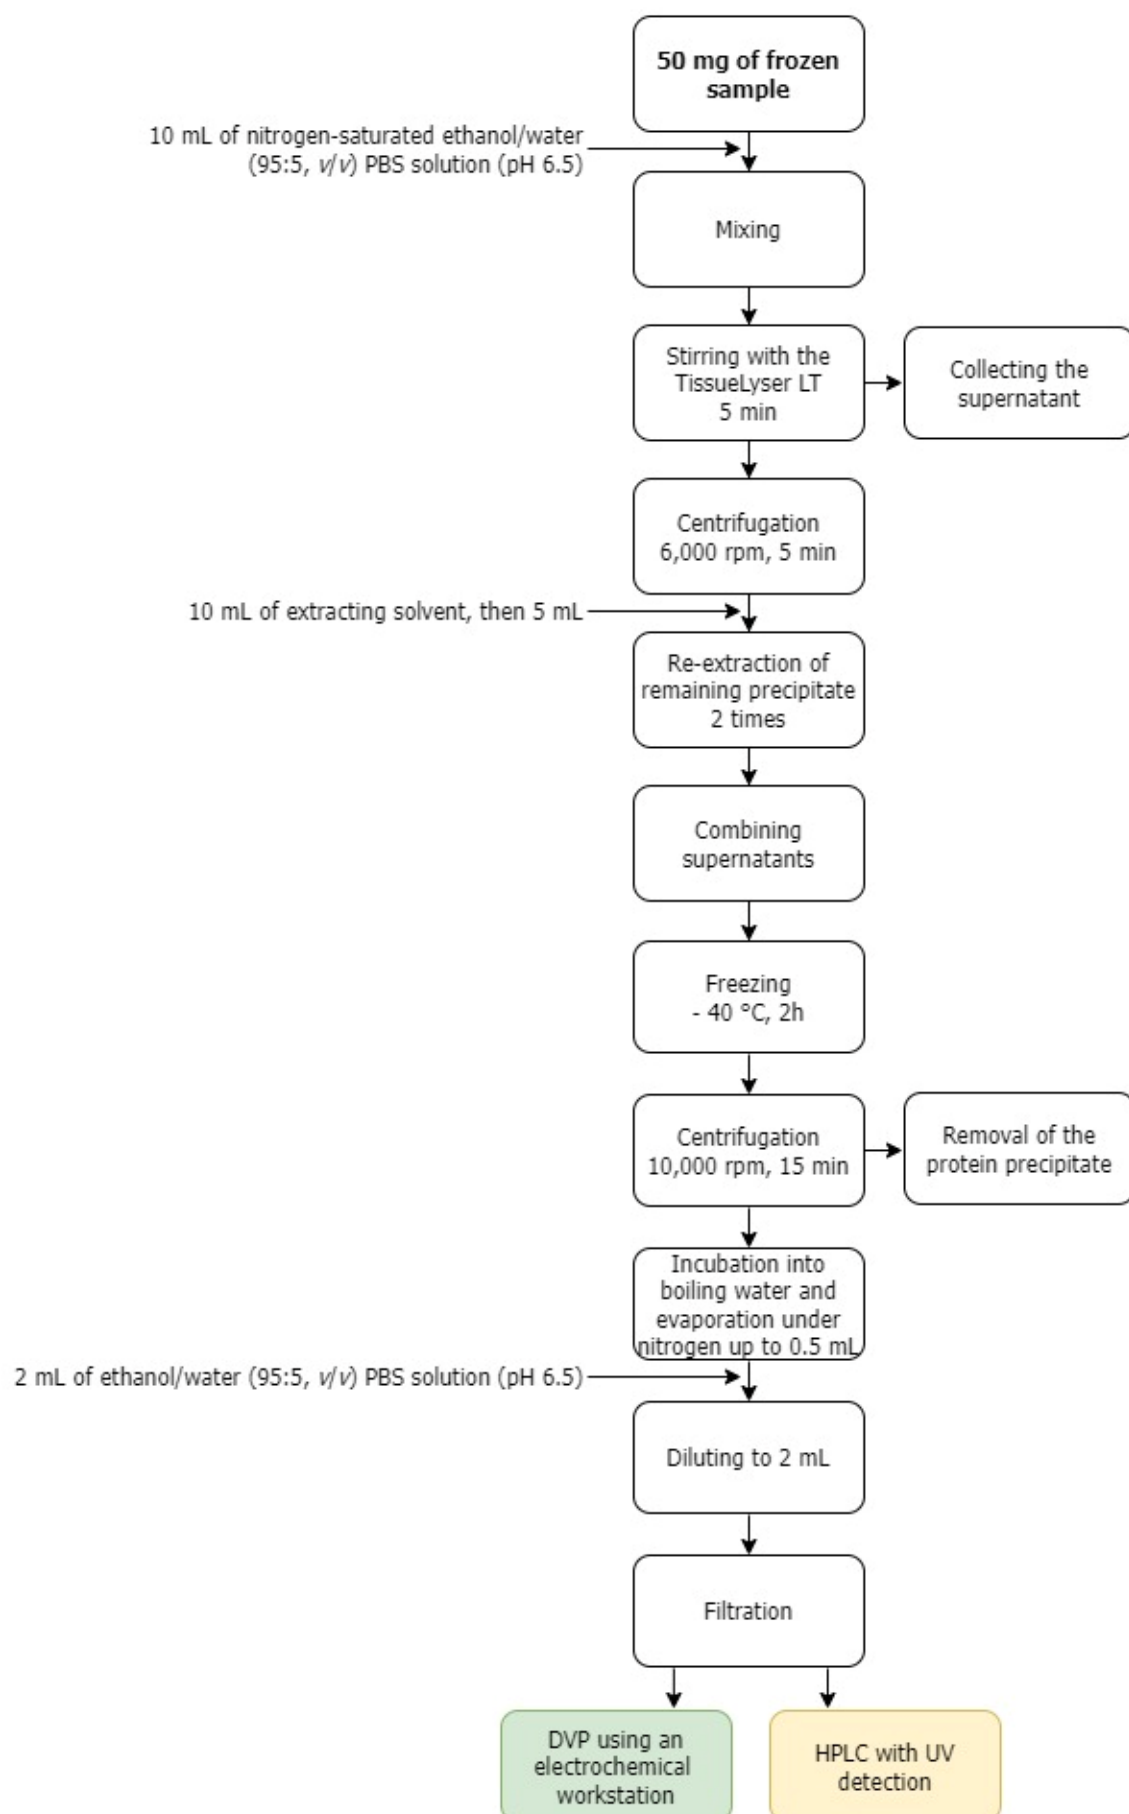

**Figure S5.** Workflow of the analytical method adapted from Li et al., 2016.

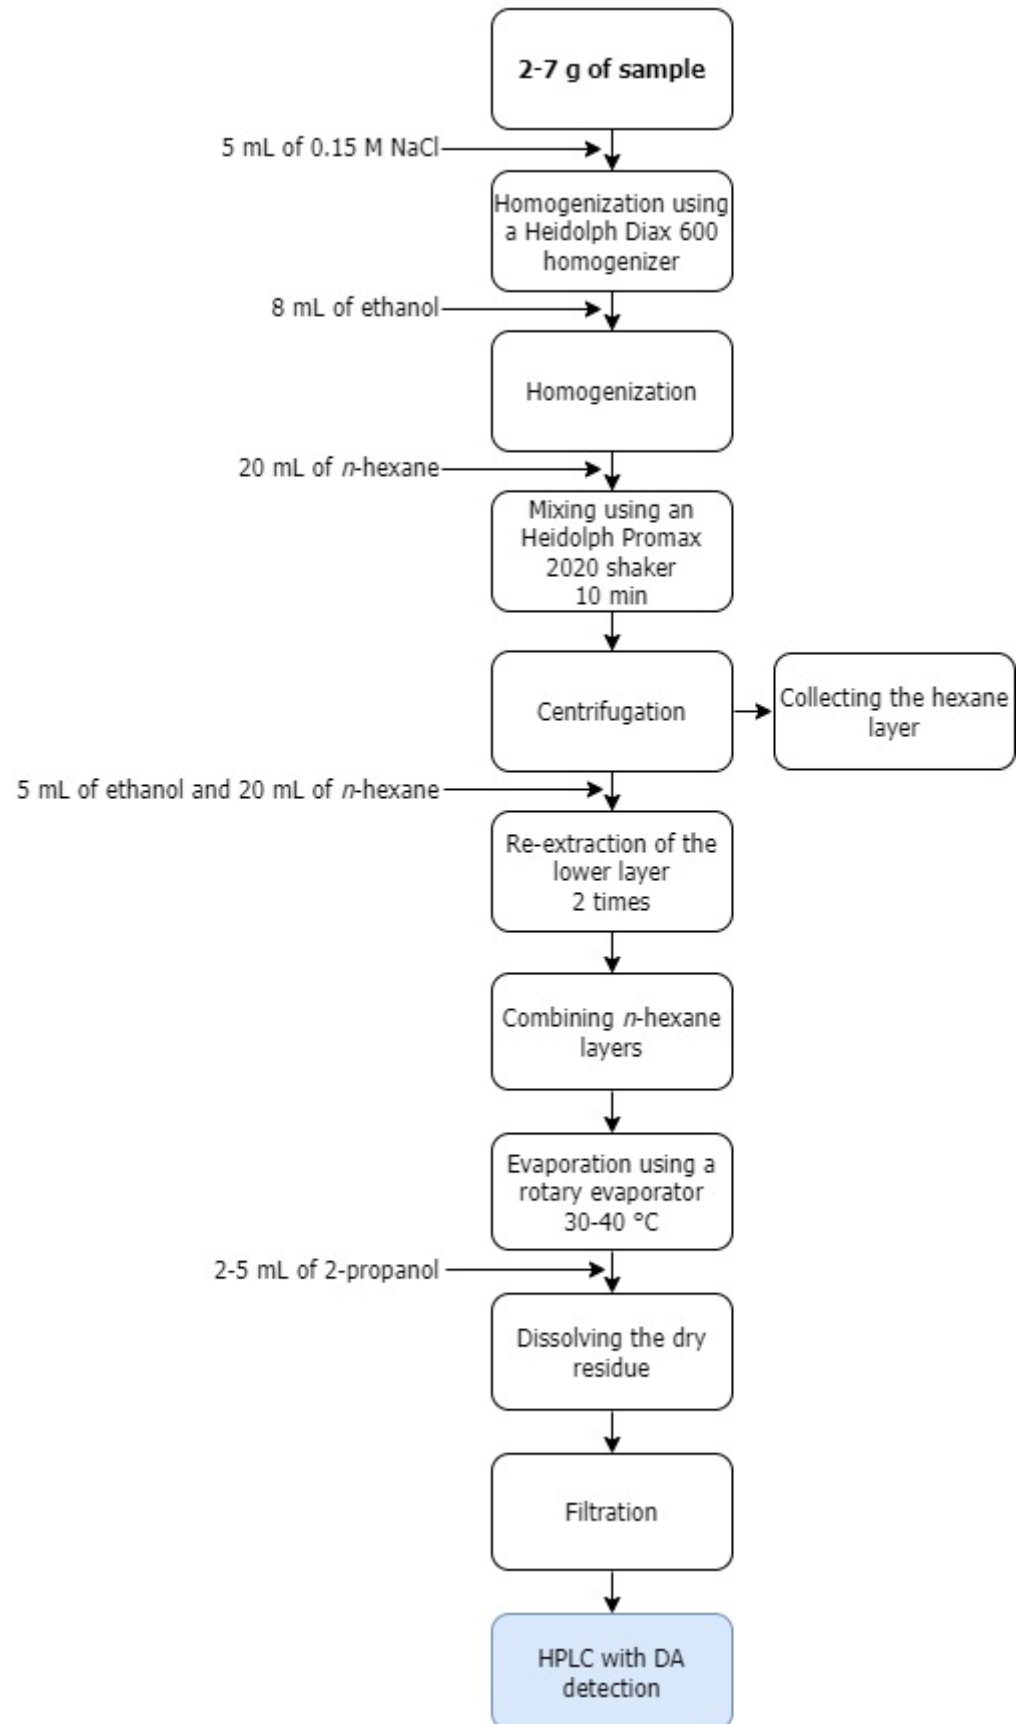

**Figure S6.** Workflow of the analytical method adapted from Mattila and Kumpulainen, 2001 (direct extraction method).

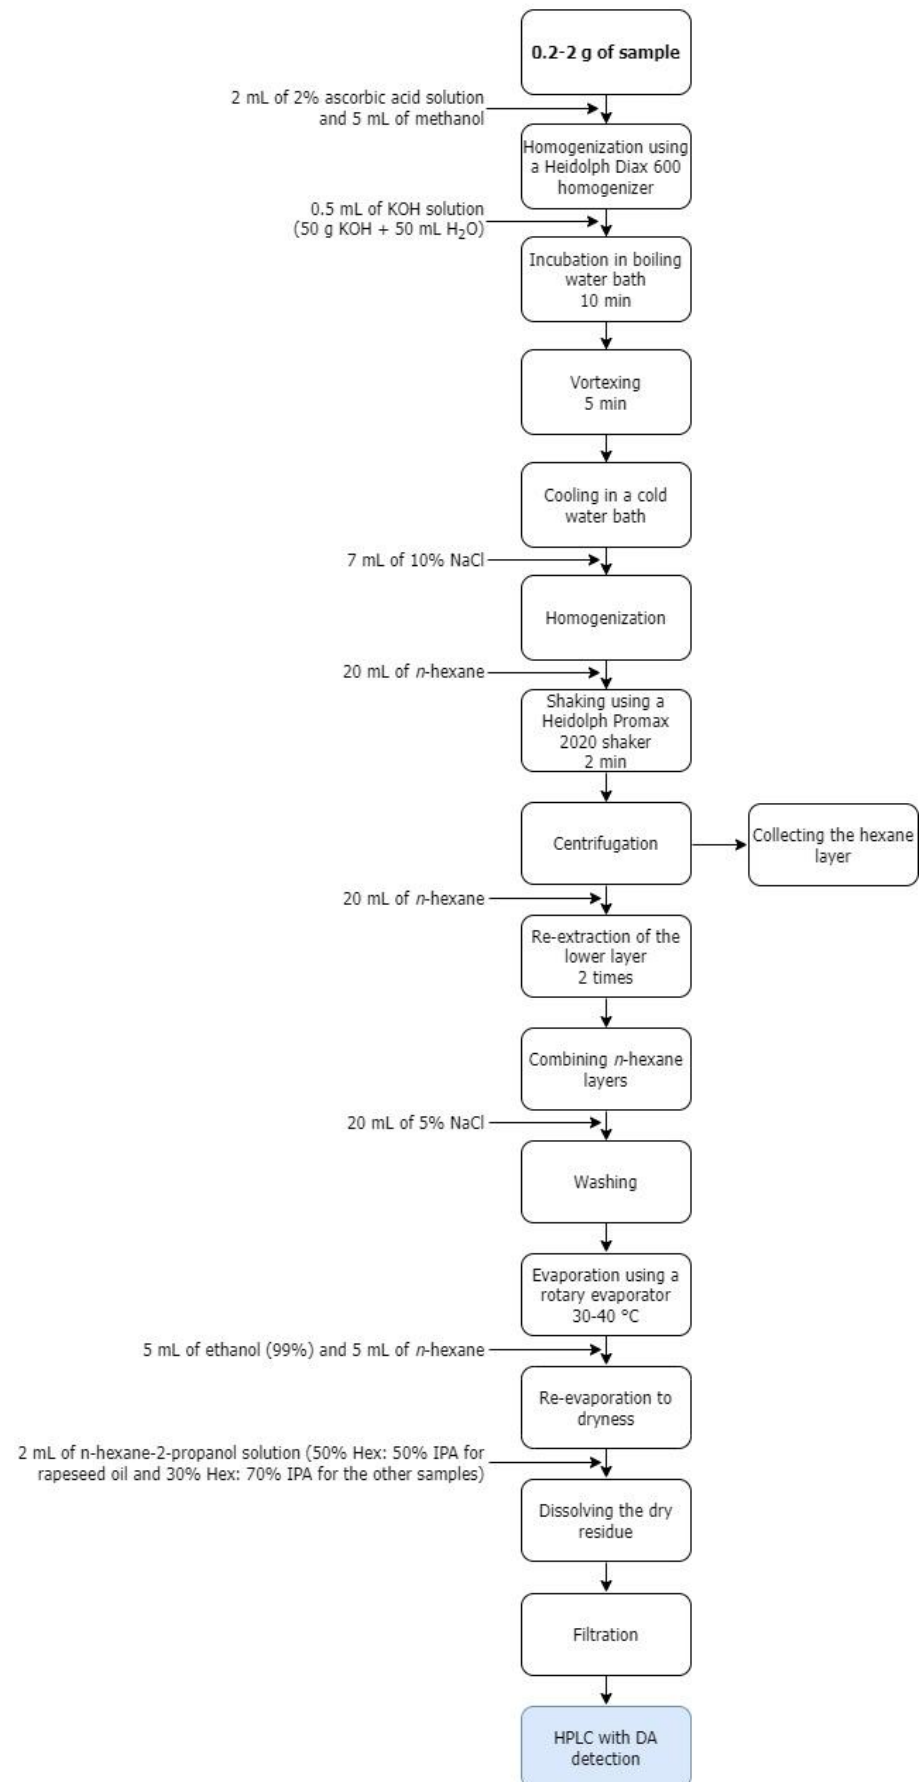

**Figure S7.** Workflow of the analytical method adapted from Mattila and Kumpulainen, 2001 (saponification-extraction method).

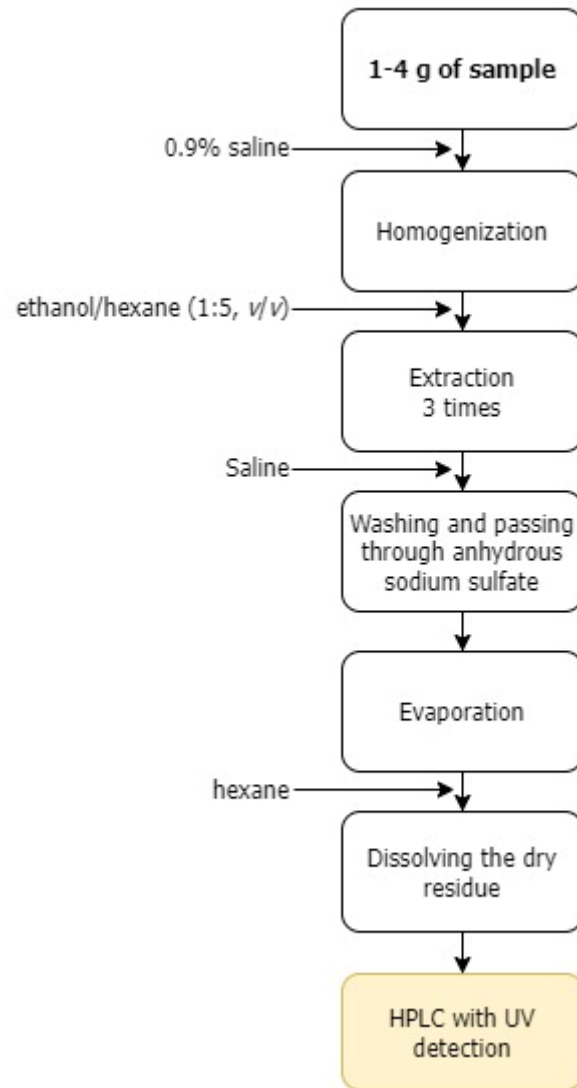

**Figure S8.** Workflow of the analytical method adapted from Weber et al., 1997.

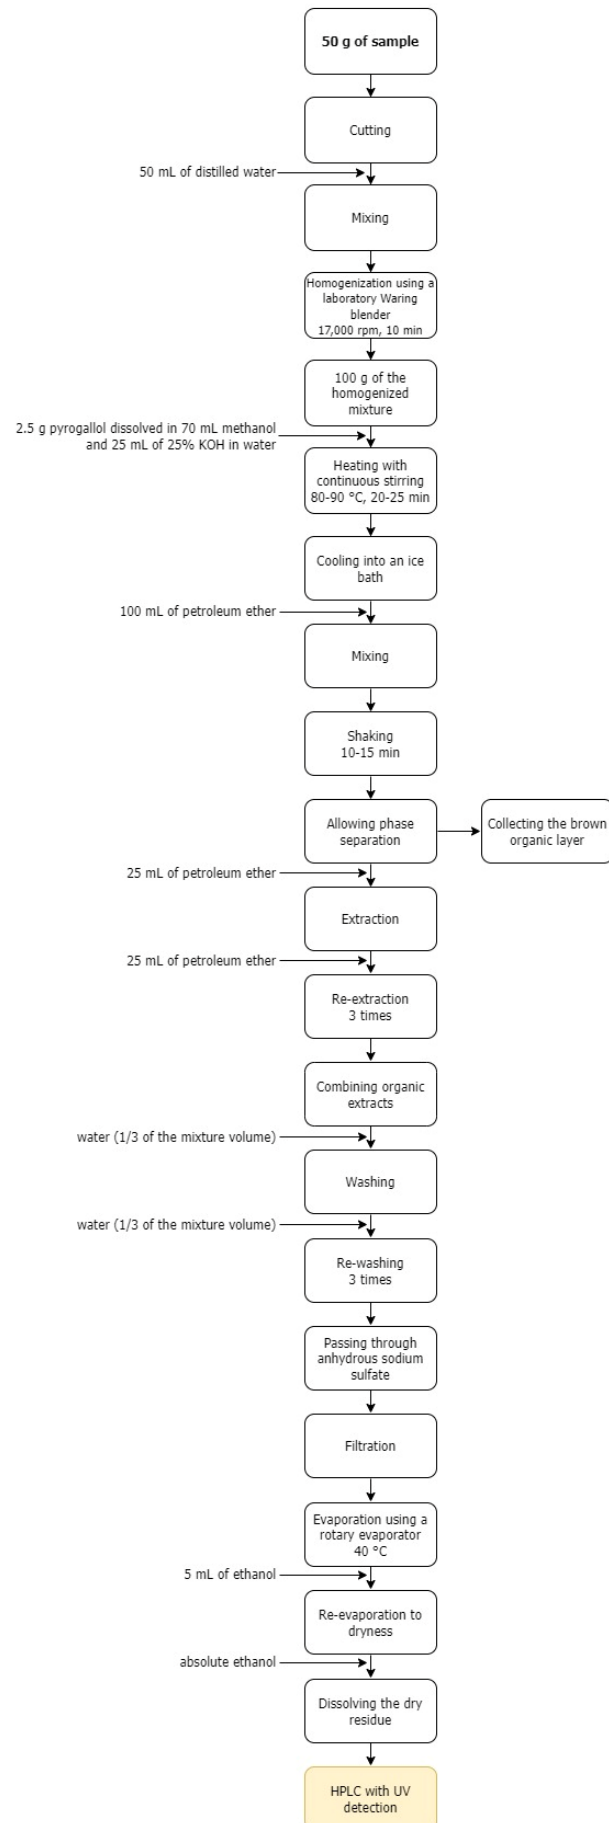

**Figure S9.** Workflow of the analytical method adapted from Al-Faraji and Shanshal, 2010.

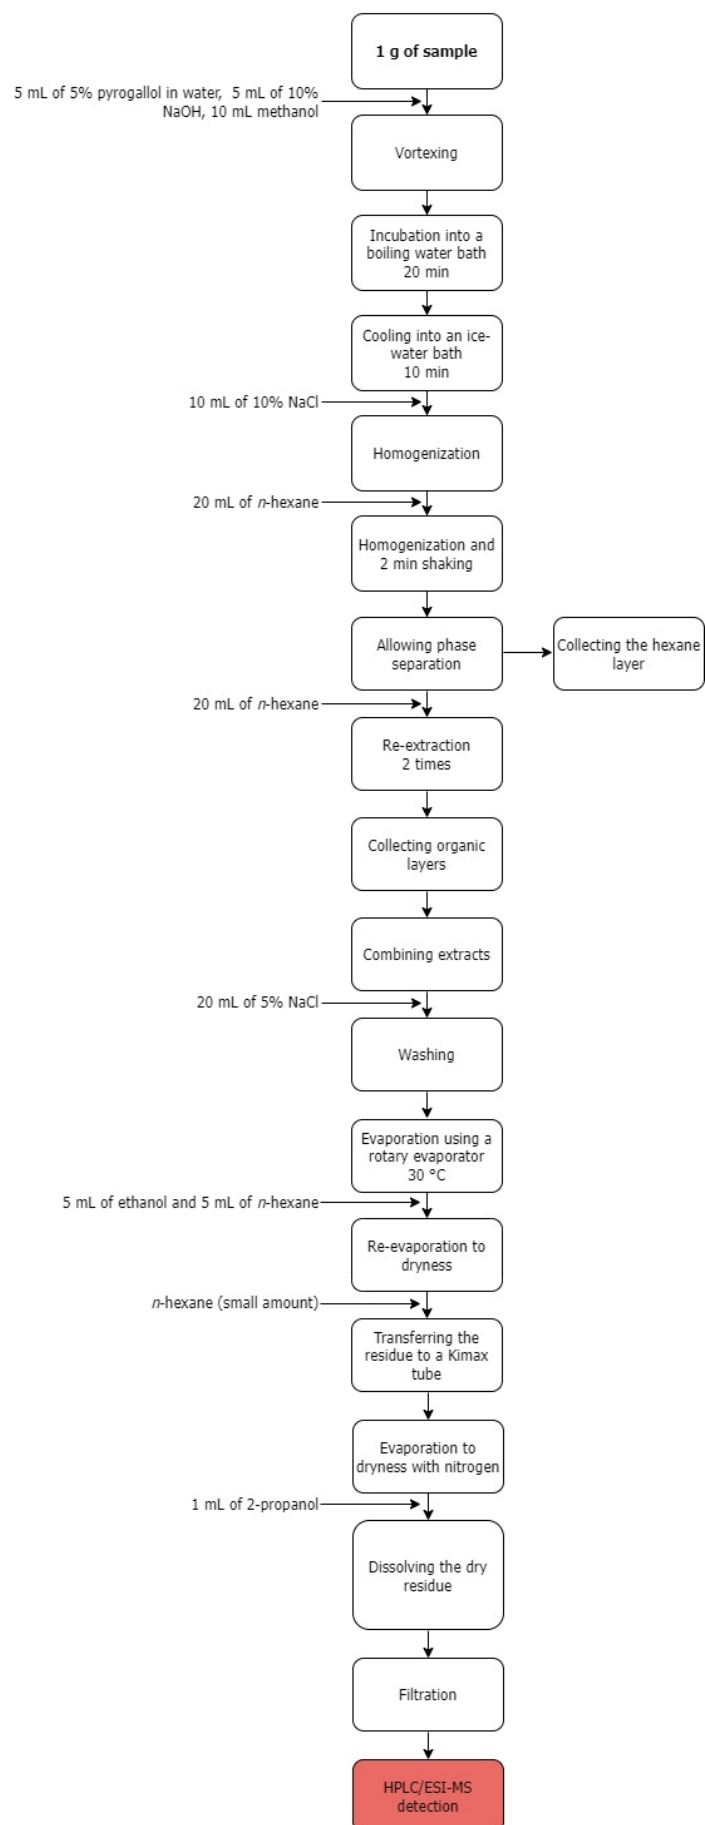

**Figure S10.** Workflow of the analytical method adapted from Pyo, 2010.

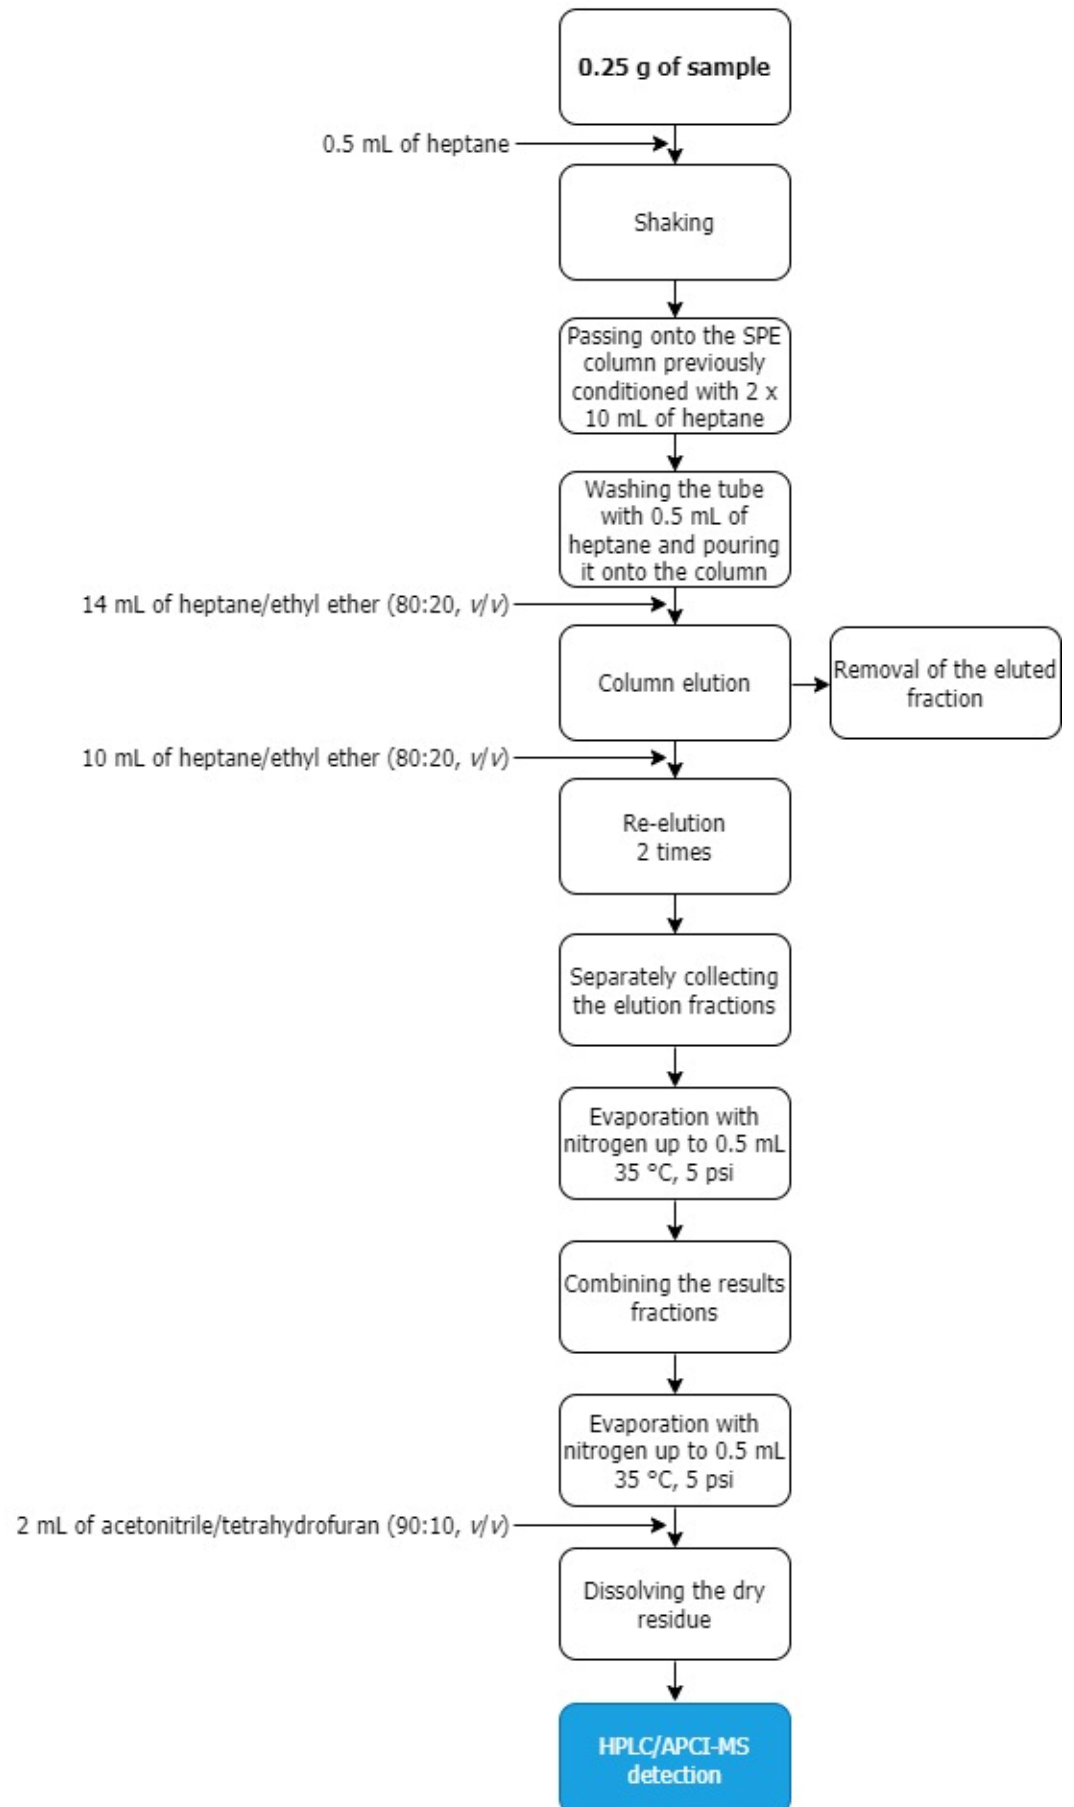

**Figure S11.** Workflow of the analytical method adapted from Rodríguez-Acuña et al., 2008.



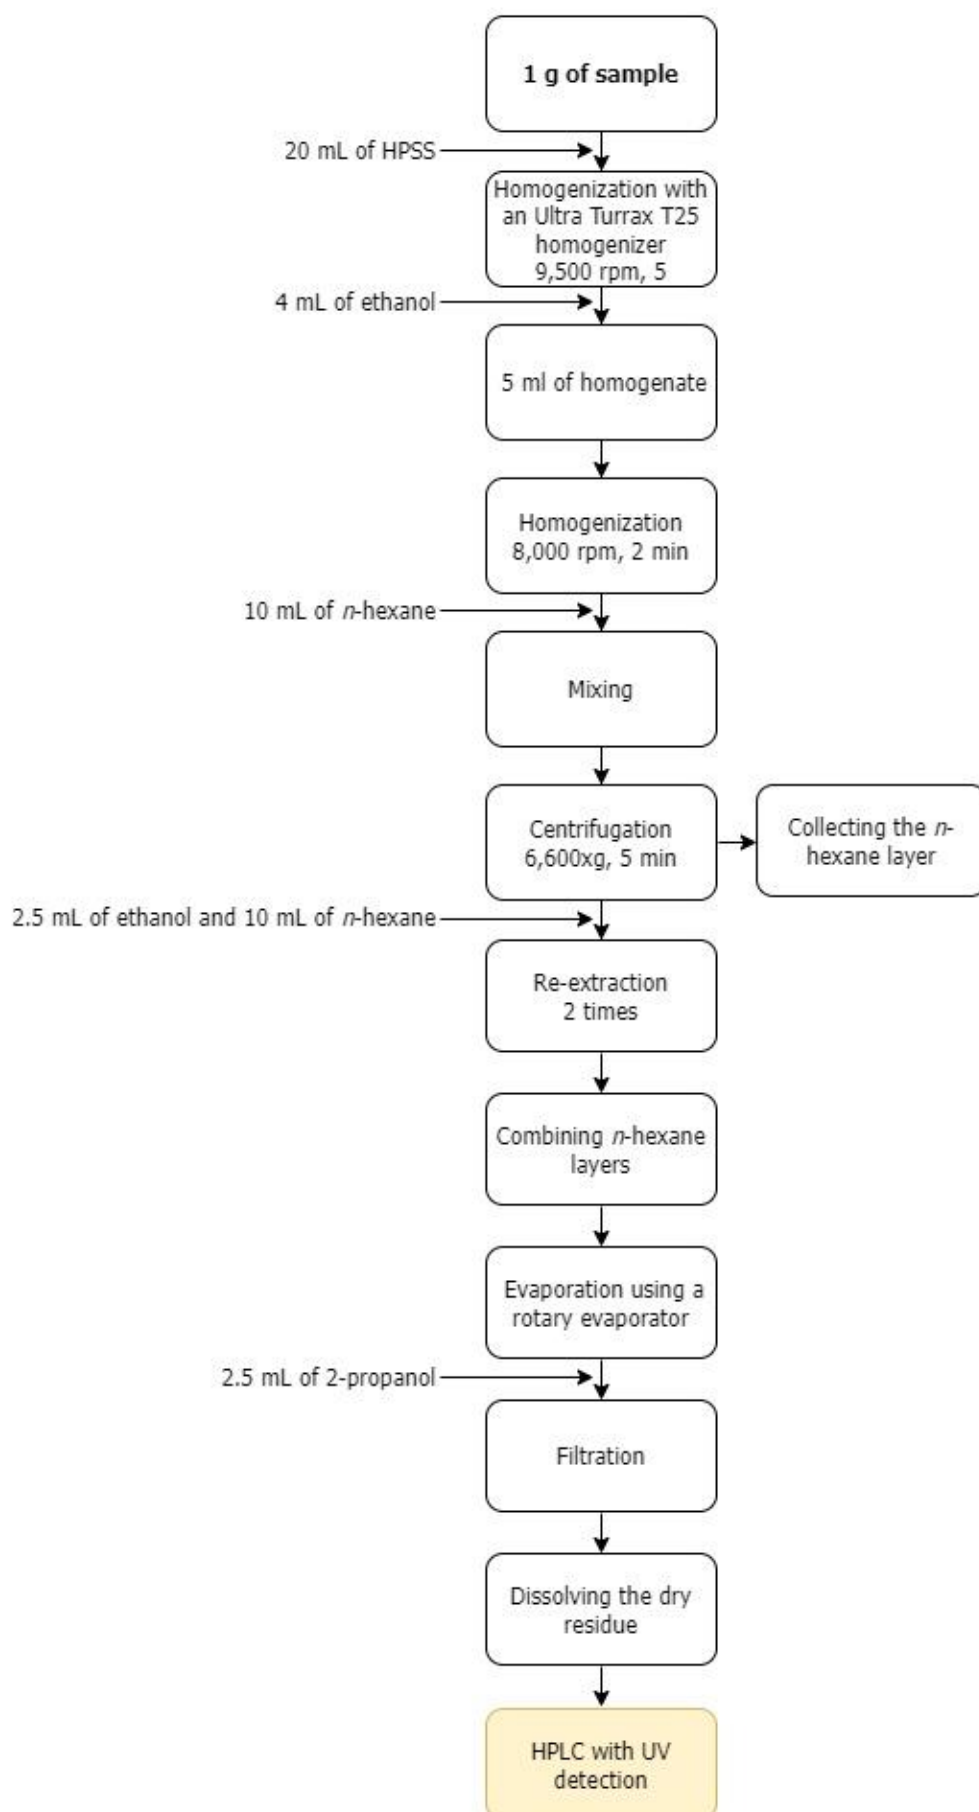

**Figure S12.** Workflow of the analytical method adapted from Tobin et al., 2014.

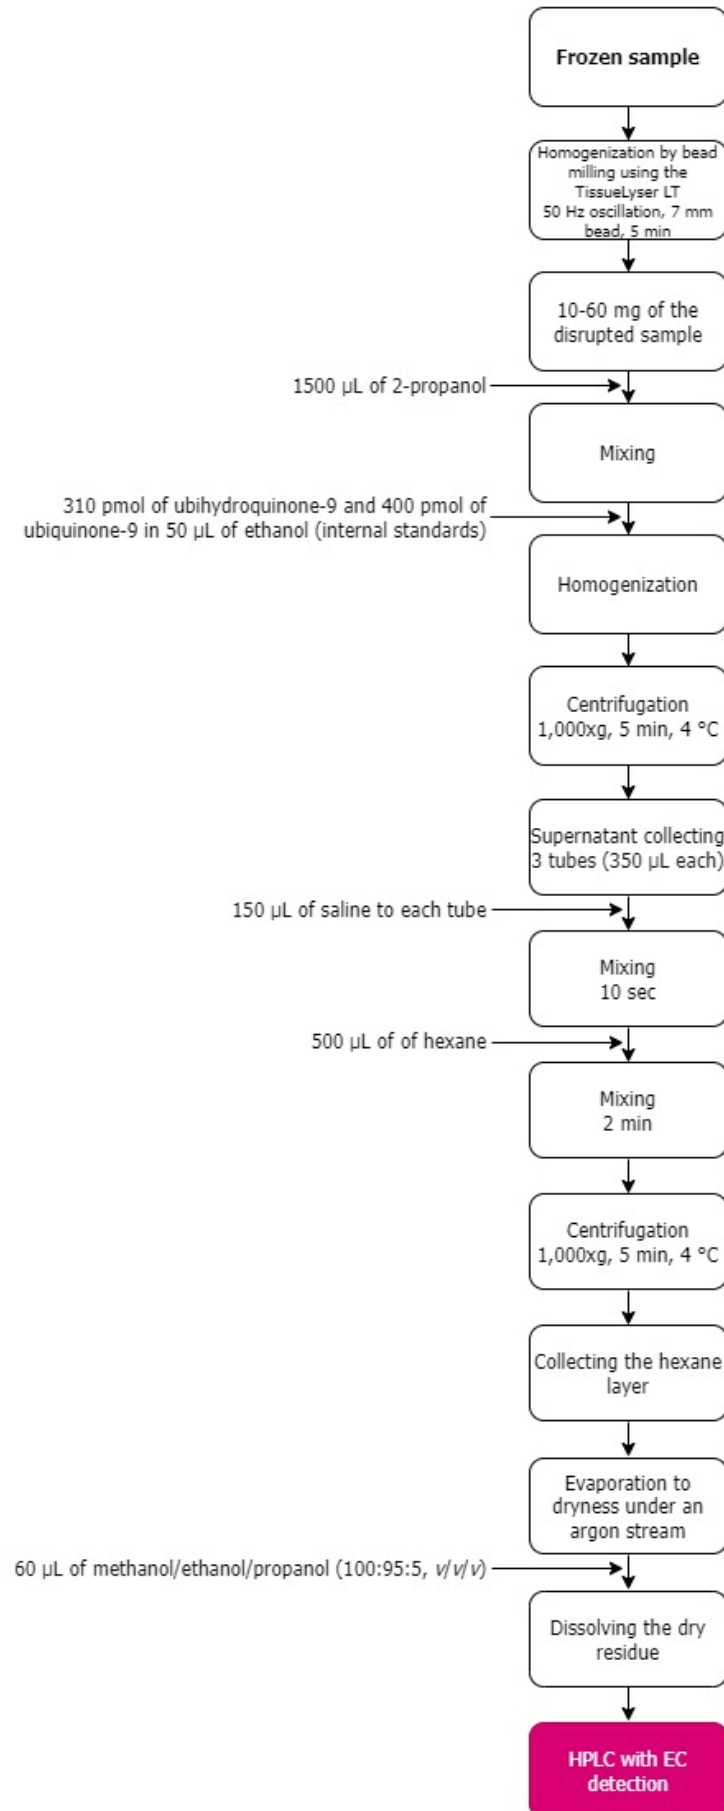

**Figure S13.** Workflow of the analytical method adapted from Niklowitz et al., 2013.

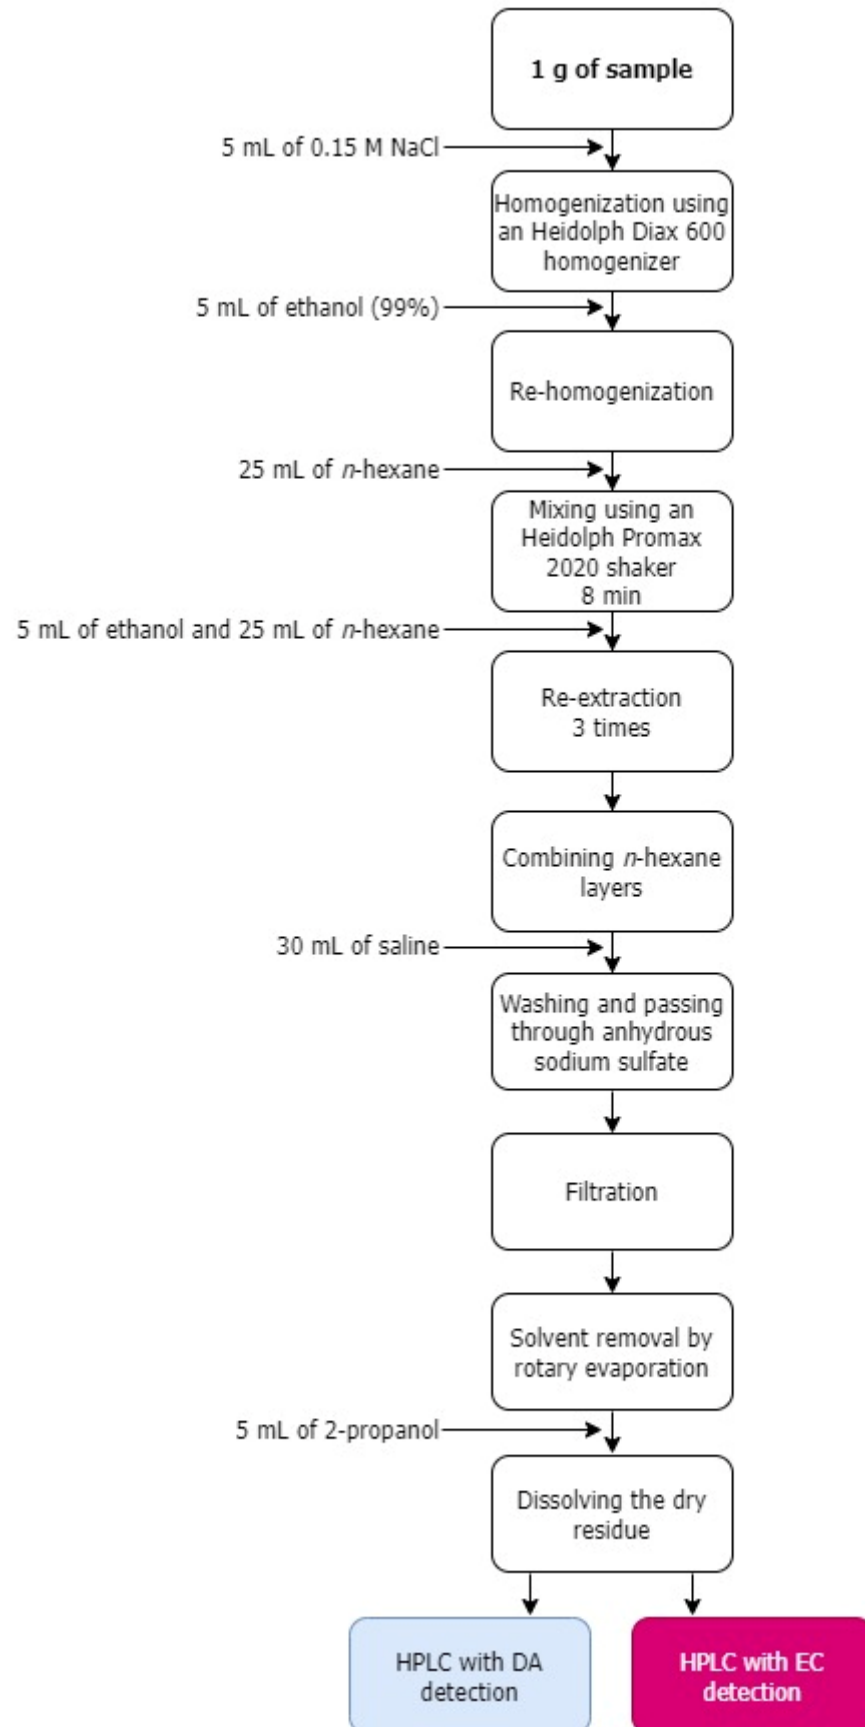

**Figure S14.** Workflow of the analytical method adapted from Mattila et al., 2000.

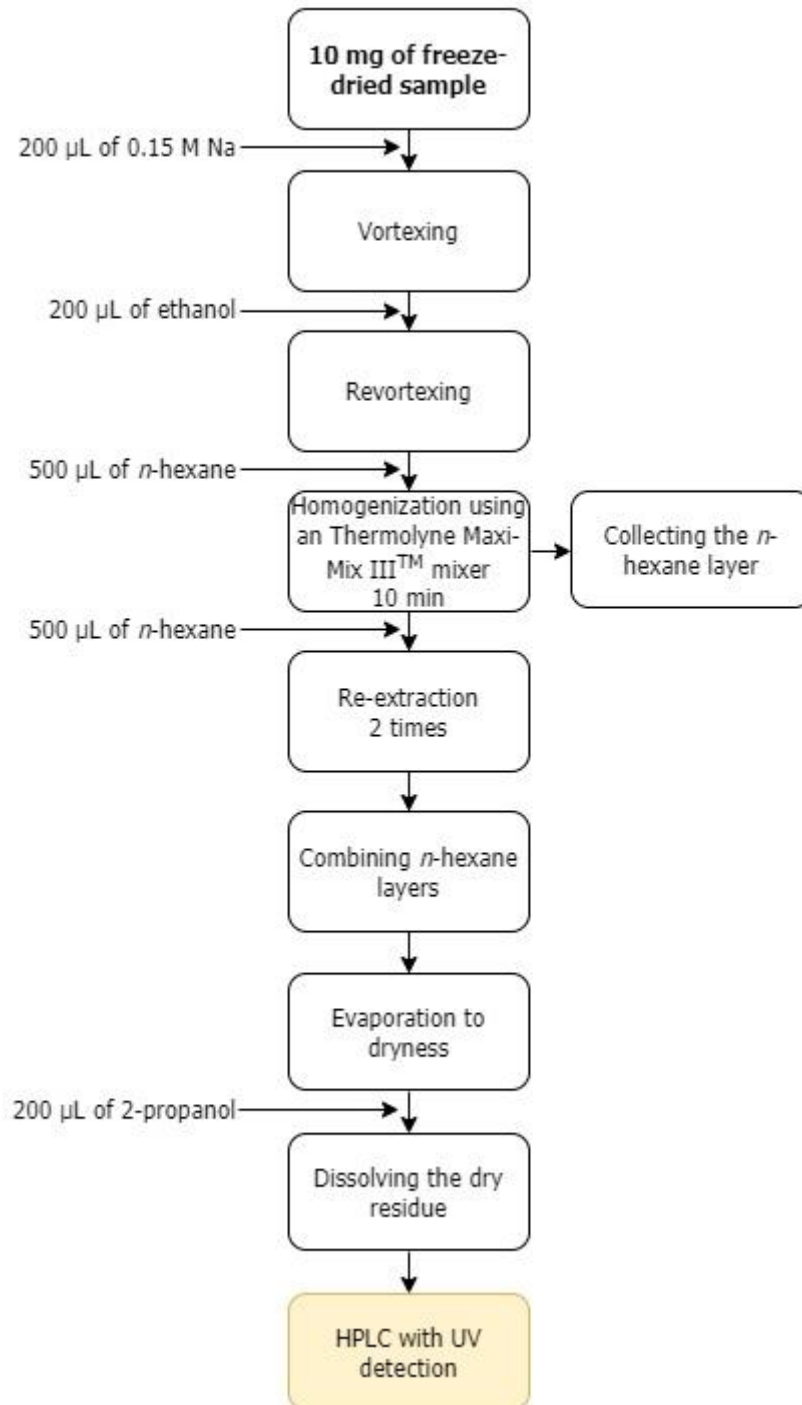

**Figure S15.** Workflow of the analytical method adapted from Purchas et al., 2004.

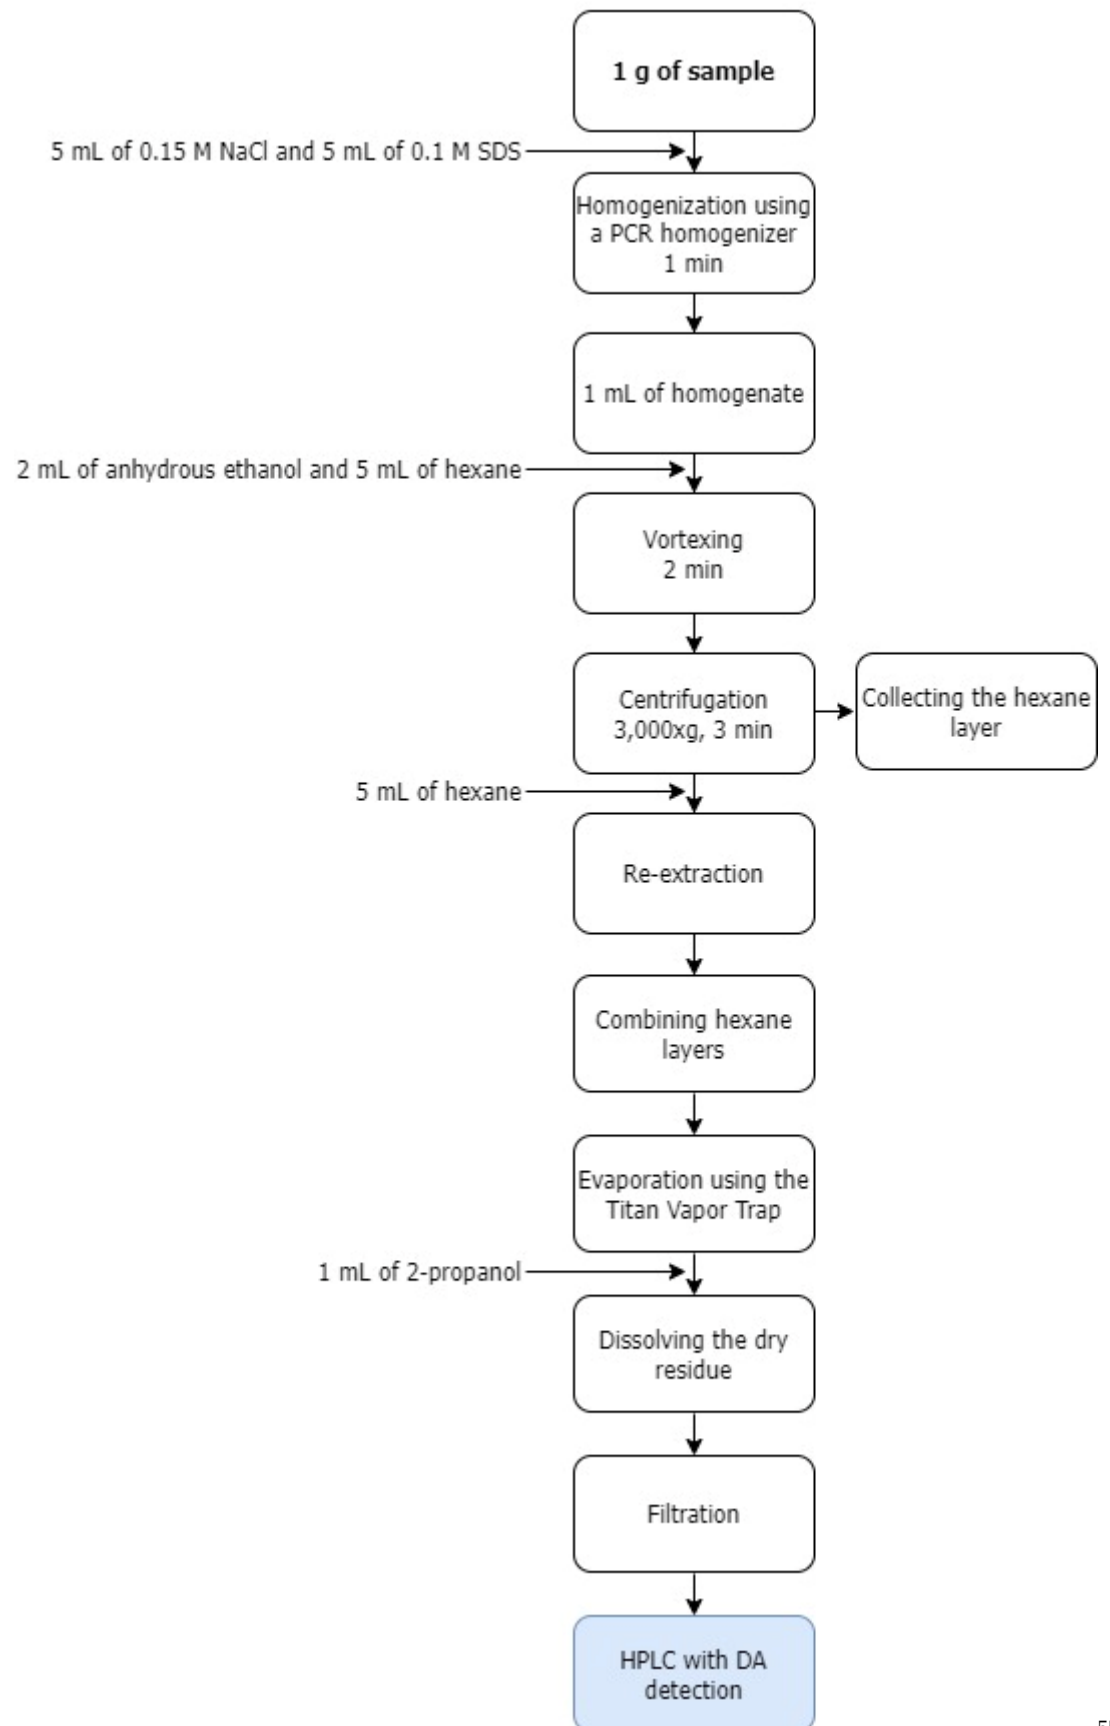

**Figure S16.** Workflow of the analytical method adapted from Souchet and Laplante, 2007.

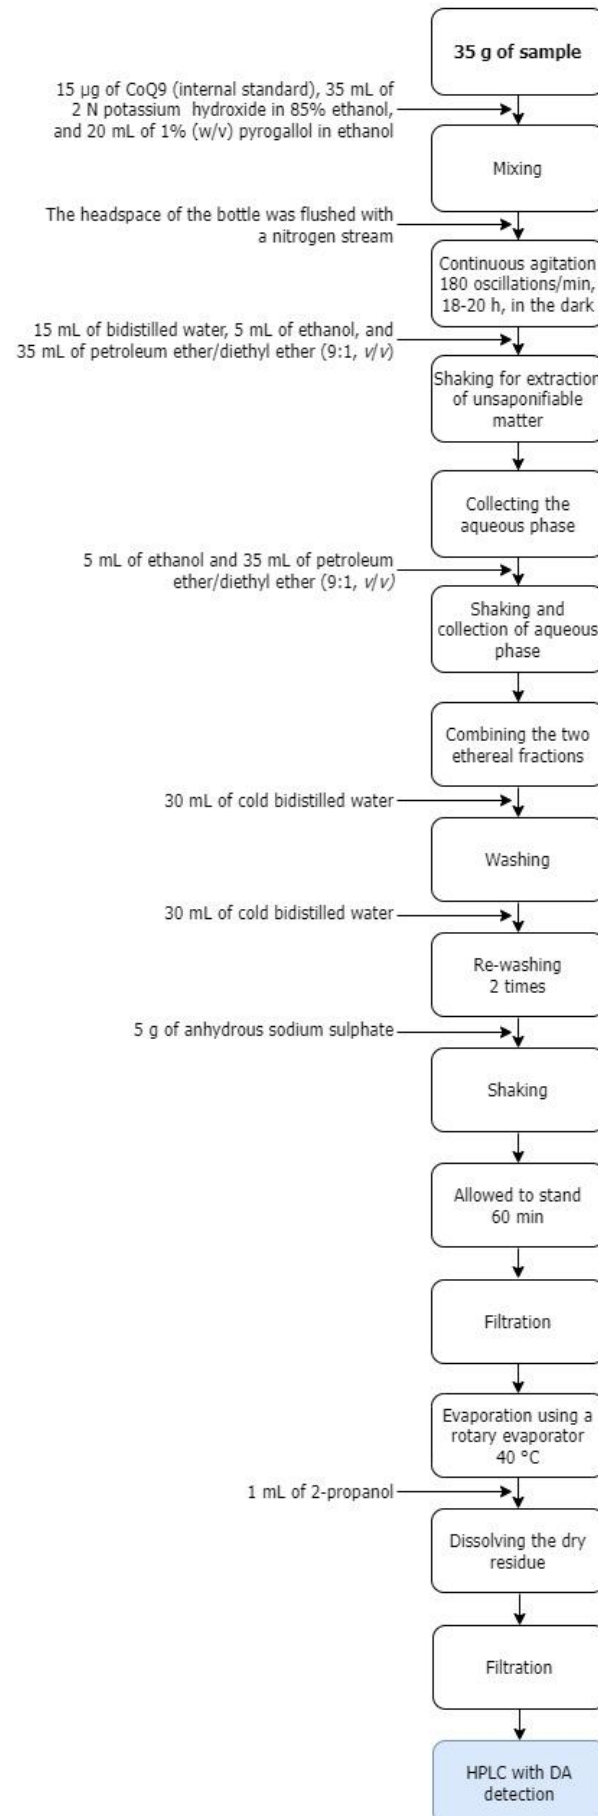

**Figure S17.** Workflow of the analytical method adapted from Mandrioli et al., 2018.

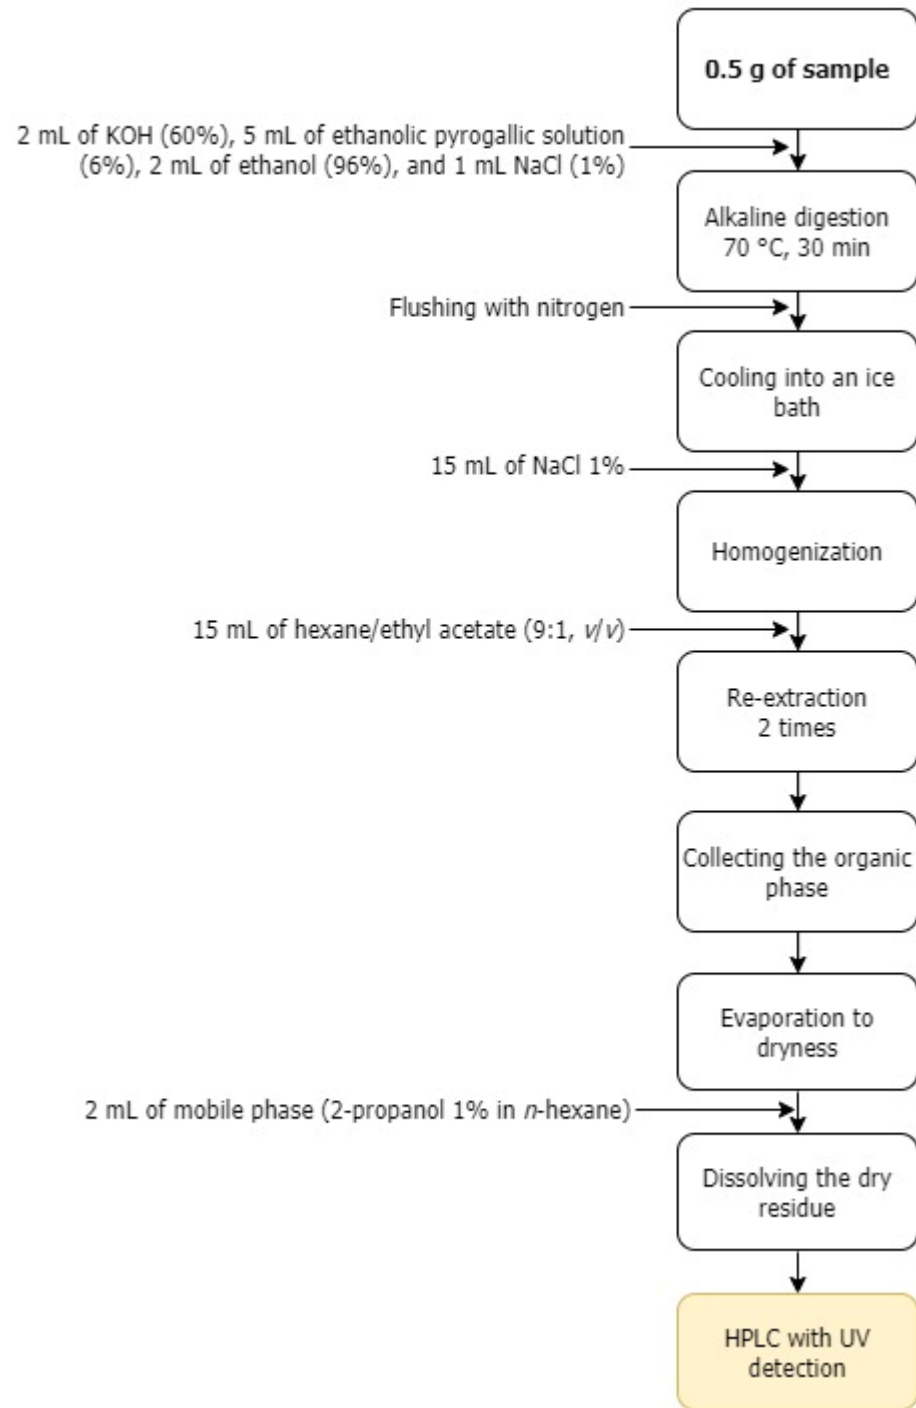

**Figure S18.** Workflow of the analytical method adapted from Manzi and Durazzo, 2015.

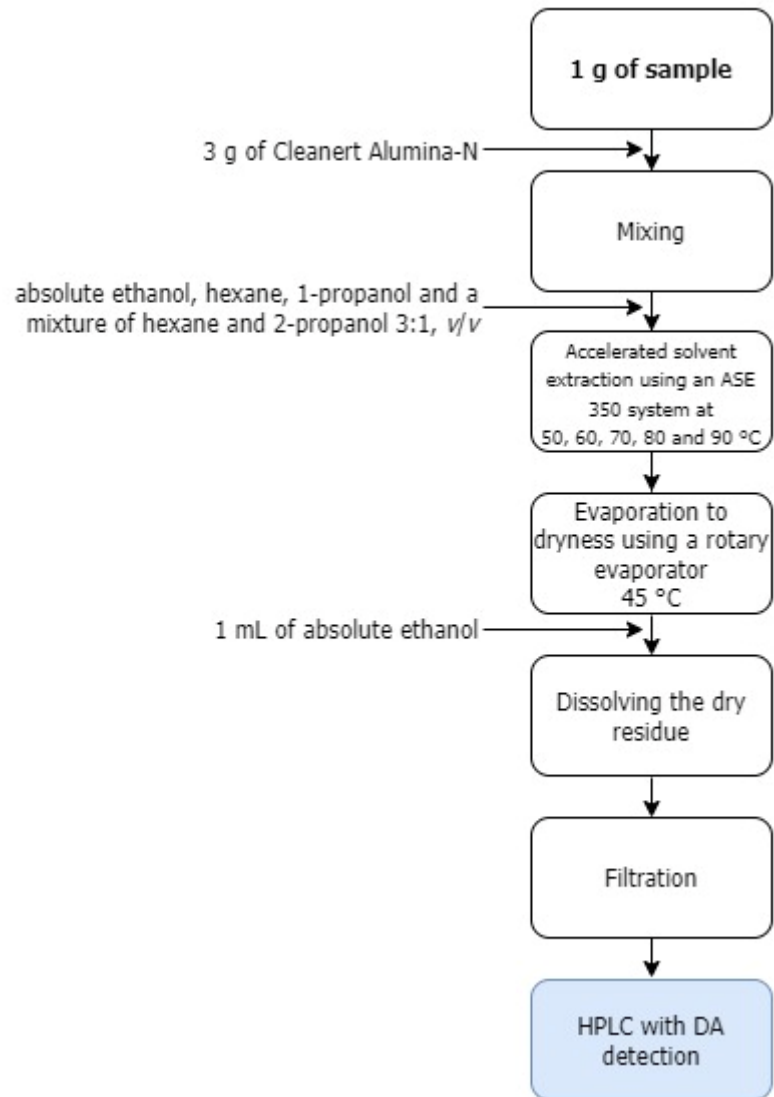

**Figure S19.** Workflow of the analytical method adapted from Xue et al., 2012.



## References

1. Weber, C.; Bysted, A.; Hølmer, G. Coenzyme Q<sub>10</sub> in the diet-daily intake and relative bioavailability. *Mol Aspects Med* **1997**, *18*, 251–254. [https://doi.org/10.1016/S0098-2997\(97\)00003-4](https://doi.org/10.1016/S0098-2997(97)00003-4)
2. Mattila, P.; Lehtonen, M.; Kumpulainen, J. Comparison of in-line connected diode array and electrochemical detectors in the high-performance liquid chromatographic analysis of coenzymes Q(9) and Q(10) in food materials. *JAF* **2000**, *48*, 1229–1233. <https://doi.org/10.1021/jf990581f>
3. Mattila, P.; Kumpulainen, J. Coenzymes Q<sub>9</sub> and Q<sub>10</sub>: contents in foods and dietary intake. *J Food Compo Anal* **2001**, *14*, 409–417. <https://doi.org/10.1006/jfca.2000.0983>
4. Purchas, R.W.; Rutherford, S.M.; Pearce, P.D.; Vather, R.; Wilkinson, B.H.P. Concentrations in beef and lamb of taurine, carnosine, coenzyme Q<sub>10</sub>, and creatine. *Meat Sci* **2004**, *66*, 629–637. [https://doi.org/10.1016/S0309-1740\(03\)00181-5](https://doi.org/10.1016/S0309-1740(03)00181-5)
5. Souchet, N.; Laplante, S. Seasonal variation of Co-enzyme Q<sub>10</sub> content in pelagic fish tissues from Eastern Quebec. *J Food Compo Anal* **2007**, *20*, 403–410. <https://doi.org/10.1016/j.jfca.2006.09.004>
6. Ercan, P.; El, S.N. Changes in content of coenzyme Q<sub>10</sub> in beef muscle, beef liver and beef heart with cooking and *in vitro* digestion. *J Food Compos Anal* **2011**, *24*, 1136–1140. <https://doi.org/10.1016/j.jfca.2011.05.002>
7. Tobin, B.D.; O'Sullivan, M.G.; Hamill, R.; Kerry, J.P. Effect of cooking and *in vitro* digestion on the stability of co-enzyme Q<sub>10</sub> in processed meat products. *Food Chem* **2014**, *150*, 187–192. <https://doi.org/10.1016/j.foodchem.2013.10.138>
8. Román-Pizarro, V.; Fernández-Romero, J.M.; Gómez-Hens, A. Automatic determination of coenzyme Q<sub>10</sub> in food using cresyl violet encapsulated into magnetoliposomes. *Food Chem* **2017**, *221*, 864–870. <https://doi.org/10.1016/j.foodchem.2016.11.085>
9. Kubo, H.; Fujii, K.; Kawabe, T.; Matsumoto, S.; Kishida, H.; Hosoe, K. Food content of ubiquinol-10 and ubiquinone-10 in the Japanese diet. *J Food Compo Anal* **2008**, *21*, 199–210. <https://doi.org/10.1016/j.jfca.2007.10.003>
10. Laplante, S.; Souchet, N.; Bryl, P. Comparison of low-temperature processes for oil and coenzyme Q<sub>10</sub> extraction from mackerel and herring. *Eur J Lipid Sci Technol* **2009**, *111*, 135–141. <https://doi.org/10.1002/ejlt.200800133>
11. Stiff, M.R.; Weissinger, A.K.; Daneshmand, D.A. Analysis of CoQ<sub>10</sub> in cultivated tobacco by a high-performance liquid chromatography–ultraviolet method. *J Agric Food Chem* **2011**, *59*, 9054–9058. <https://doi.org/10.1021/jf201130z>
12. Niklowitz, P.; Döring, F.; Paulussen, M.; Menke, T. Determination of coenzyme Q<sub>10</sub> tissue status via high-performance liquid chromatography with electrochemical detection in swine tissues (*Sus scrofa domestica*). *Anal Biochem* **2013**, *437*, 88–94. <https://doi.org/10.1016/j.ab.2013.02.015>
13. Li, D.; Deng, W.; Xu, H.; Sun, Y.; Wang, Y.; Chen, S.; Ding, X. Electrochemical investigation of coenzyme Q<sub>10</sub> on silver electrode in ethanol aqueous solution and its determination using differential pulse voltammetry. *J Lab Autom* **2016**, *21*, 579–589. <https://doi.org/10.1177/2211068216644442>
14. Zu, Y.; Zhao, C.; Li, C.; Zhang, L. A rapid and sensitive LC-MS/MS method for determination of coenzyme Q<sub>10</sub> in tobacco (*Nicotiana tabacum* L.) leaves. *J Sep Sci* **2006**, *29*, 1607–1612. <https://doi.org/10.1002/jssc.200600047>
15. Pyo, Y.H. Coenzyme Q<sub>10</sub> and Q<sub>9</sub> contents in 6 commercial vegetable oils and their average daily intakes in Korea. *Food Sci Biotechnol* **2010**, *19*, 837–841. <https://doi.org/10.1007/s10068-010-0118-7>
16. Al-Faraji, G.; Shanshal, M. Determination of Ubiquinone,10 in ten different sorts of Iraqi dates "*Phoenix dactylifera*" at different stages of fruit maturation. *JJC* **2010**, *5*, 389–400.
17. Manzi, P.; Durazzo, A. Rapid determination of coenzyme Q<sub>10</sub> in cheese using high-performance liquid chromatography. *Dairy Sci Technol* **2015**, *95*, 533–539. <https://doi.org/10.1007/s13594-015-0222-9>
18. Mandrioli, M.; Semeniuc, C.A.; Boselli, E.; Rodriguez-Estrada, M.T. Ubiquinone in Italian high-quality raw cow milk. *Ital J Food Sci* **2018**, *30*, 144–155. <https://doi.org/10.14674/IJFS-871>
19. Rodríguez-Acuña, R.; Brenne, E.; Lacoste, F. Determination of coenzyme Q<sub>10</sub> and Q<sub>9</sub> in vegetable oils. *J Agric Food Chem* **2008**, *56*, 6241–6245. <https://doi.org/10.1021/jf800103e>
20. Xue, X.; Zhao, J.; Chen, L.; Zhou, J.; Yue, B.; Li, Y.; Wu, L.; Liu, F. Analysis of coenzyme Q<sub>10</sub> in bee pollen using online cleanup by accelerated solvent extraction and high performance liquid chromatography. *Food Chem* **2012**, *133*, 573–578. <https://doi.org/10.1016/j.foodchem.2011.12.085>
